# Supplementary material for: Comparison of recovery efficiency and matrix effect reduction in pesticide residue analysis: QuEChERS with d-SPE, SPE, and FaPEx in apples and Korean cabbage
Source: Royal Society of Chemistry journal article supplement (doi:10.1039/d3ay00612c), 2023-01-01
Supplement: d3ay00612c1.pdf [file d3ay00612c1.pdf]

**SUPPLEMENTARY MATERIAL**

**Comparison of Recovery Efficiency and Matrix Effect Reduction in Pesticide Residue Analysis:  
QuEChERS with d-SPE, SPE, and FaPEX in Apples and Korean Cabbage**

Hyosub Lee,<sup>\*a</sup> Yuran Cho,<sup>a</sup> Geonhee Jung,<sup>a</sup> Hyanghee Kim,<sup>a</sup> Wontae Jeong<sup>a</sup>

<sup>a</sup>National Institute of Agricultural Sciences, 166 Nongsaengmyeong-ro, Iseo-myeon, Wanju-gun, Jeollabuk-do,  
55365, Korea

<sup>\*</sup>Corresponding author. Fax: +82 63 238 3238

Email address: lhs8255@korea.kr

Table S1. Comparison of recovery rates in apples and Korean cabbages according to the purification methods in QuEChERS and d-SPE

| Group | QuChERS and d-SPE clean up |                |         |                |         |                |
|-------|----------------------------|----------------|---------|----------------|---------|----------------|
|       | PSA                        |                | PSA+C18 |                | PSA+GCB |                |
|       | Apple                      | Korean cabbage | Apple   | Korean cabbage | Apple   | Korean cabbage |
| I     | 1%                         | 6%             | 1%      | 6%             | 0%      | 5%             |
| II    | 9%                         | 3%             | 9%      | 3%             | 5%      | 5%             |
| III   | 89%                        | 85%            | 89%     | 88%            | 92%     | 87%            |
| IV    | 1%                         | 5%             | 2%      | 3%             | 2%      | 2%             |
| V     | 0%                         | 0%             | 0%      | 0%             | 1%      | 0%             |

Table S2. Comparison of recovery rates in apples and Korean cabbages according to the purification methods in QuEChERS and SPE

| Group | QuChERS and SPE clean up |                |         |                |         |                |             |                |
|-------|--------------------------|----------------|---------|----------------|---------|----------------|-------------|----------------|
|       | PSA                      |                | PSA+C18 |                | PSA+GCB |                | Lipid filtr |                |
|       | Apple                    | Korean cabbage | Apple   | Korean cabbage | Apple   | Korean cabbage | Apple       | Korean cabbage |
| I     | 0%                       | 1%             | 2%      | 4%             | 2%      | 2%             | 2%          | 6%             |
| II    | 9%                       | 8%             | 12%     | 11%            | 16%     | 9%             | 7%          | 5%             |
| III   | 84%                      | 83%            | 83%     | 85%            | 79%     | 86%            | 89%         | 87%            |
| IV    | 6%                       | 9%             | 2%      | 0%             | 2%      | 3%             | 2%          | 2%             |
| V     | 0%                       | 0%             | 2%      | 0%             | 1%      | 0%             | 0%          | 0%             |

Table S3. Comparison of recovery rates in apples and Korean cabbages according to the purification methods in FaPEx

| Group | FaPEx |                |           |                |           |                |
|-------|-------|----------------|-----------|----------------|-----------|----------------|
|       | Amine |                | Amine+C18 |                | Amine+GCB |                |
|       | Apple | Korean cabbage | Apple     | Korean cabbage | Apple     | Korean cabbage |
| I     | 9%    | 5%             | 5%        | 5%             | 20%       | 5%             |
| II    | 88%   | 31%            | 87%       | 21%            | 79%       | 85%            |
| III   | 3%    | 63%            | 8%        | 70%            | 2%        | 9%             |
| IV    | 1%    | 2%             | 1%        | 4%             | 0%        | 0%             |
| V     | 0%    | 0%             | 0%        | 0%             | 0%        | 0%             |

Table S4. Validation of 128 pesticides recovery and RSD in apple and korean cabbage at two different concentration and clean-up methods with LC-MS/MS

| Compounds                   | Recovery (RSD, %) |              |                  |              |                 |              |                  |              |
|-----------------------------|-------------------|--------------|------------------|--------------|-----------------|--------------|------------------|--------------|
|                             | Apple             |              |                  |              | Korean cabbage  |              |                  |              |
|                             | QuChERS and SPE   |              | FaPEX(Amine+C18) |              | QuChERS and SPE |              | FaPEX(Amine+C18) |              |
|                             | 0.01<br>mg/kd     | 0.1<br>mg/kg | 0.01<br>mg/kd    | 0.1<br>mg/kg | 0.01<br>mg/kd   | 0.1<br>mg/kg | 0.01<br>mg/kd    | 0.1<br>mg/kg |
| Acephate                    | 93(0)             | 101(1)       | 81(1)            | 102(1)       | 89(2)           | 91(2)        | 117(20)          | 78(5)        |
| Acetamiprid                 | 98(2)             | 103(1)       | 87(1)            | 81(1)        | 105(2)          | 101(2)       | 94(3)            | 80(8)        |
| Acrinathrin                 | 113(18)           | 103(2)       | 103(5)           | 78(1)        | 103(9)          | 104(3)       | 96(2)            | 80(6)        |
| Alachlor                    | 91(5)             | 101(2)       | 91(4)            | 82(2)        | 117(8)          | 105(4)       | 92(2)            | 78(8)        |
| Ametoctradin                | 97(2)             | 103(1)       | 75(2)            | 74(2)        | 102(1)          | 100(2)       | 88(3)            | 78(7)        |
| Azoxystrobin                | 100(0)            | 104(1)       | 87(1)            | 79(1)        | 107(2)          | 104(2)       | 94(3)            | 79(8)        |
| Benthiavdicarb<br>isopropyl | 103(4)            | 104(1)       | 84(1)            | 79(1)        | 105(4)          | 101(2)       | 92(4)            | 79(8)        |
| Bifenthrin                  | 97(1)             | 104(2)       | 82(1)            | 77(1)        | 102(3)          | 103(3)       | 91(2)            | 79(7)        |
| Boscalid                    | 99(3)             | 103(1)       | 87(1)            | 77(1)        | 106(4)          | 102(3)       | 92(2)            | 78(9)        |
| Bromuconazole               | 87(4)             | 99(2)        | 78(3)            | 77(2)        | 85(4)           | 80(2)        | 74(9)            | 75(11)       |
| Buprofezine                 | 98(1)             | 104(1)       | 84(3)            | 76(1)        | 105(2)          | 100(3)       | 90(2)            | 79(7)        |
| Cadusafos                   | 97(1)             | 104(1)       | 86(2)            | 79(1)        | 106(2)          | 103(3)       | 92(3)            | 79(7)        |
| Carbofuran                  | 111(1)            | 103(2)       | 86(2)            | 79(2)        | 104(2)          | 103(3)       | 91(4)            | 79(8)        |
| Carpropamid                 | 99(1)             | 104(1)       | 86(1)            | 80(1)        | 105(3)          | 103(3)       | 90(5)            | 80(8)        |
| Chlorfluazuron              | 100(4)            | 103(1)       | 88(8)            | 79(2)        | 96(2)           | 103(4)       | 100(3)           | 82(8)        |
| Chlorpyrifos                | 104(2)            | 102(2)       | 84(2)            | 78(1)        | 111(4)          | 102(2)       | 96(1)            | 78(8)        |
| Chromafenozide              | 99(2)             | 104(2)       | 87(2)            | 80(2)        | 110(2)          | 104(2)       | 92(3)            | 78(6)        |
| Clethodim                   | 82(5)             | 80(2)        | 88(1)            | 78(1)        | 41(27)          | 42(4)        | 63(17)           | 79(22)       |
| Clomazone                   | 100(1)            | 104(10)      | 86(1)            | 80(1)        | 106(2)          | 103(2)       | 92(3)            | 79(8)        |
| Clothianidin                | 109(2)            | 101(2)       | 86(3)            | 79(2)        | 111(2)          | 102(3)       | 95(3)            | 80(8)        |
| Cyflufenamid                | 101(9)            | 102(3)       | 89(7)            | 80(4)        | 99(15)          | 106(1)       | 105(3)           | 76(8)        |
| Cyproconazole               | 101(3)            | 104(1)       | 81(0)            | 77(2)        | 104(4)          | 102(2)       | 87(4)            | 79(8)        |
| Cyprodinil                  | 104(3)            | 103(1)       | 84(5)            | 78(1)        | 105(2)          | 101(2)       | 89(3)            | 79(8)        |
| Diazinon                    | 102(2)            | 103(1)       | 85(1)            | 79(1)        | 103(3)          | 103(3)       | 92(3)            | 79(7)        |
| Diethofencarb               | 108(17)           | 102(2)       | 91(11)           | 84(3)        | 96(9)           | 97(5)        | 99(6)            | 83(7)        |
| Difenoconazole              | 96(2)             | 109(2)       | 86(21)           | 79(2)        | 99(1)           | 107(4)       | 108(2)           | 78(4)        |

| Compounds       | Recovery (RSD, %) |              |                  |              |                 |              |                  |              |
|-----------------|-------------------|--------------|------------------|--------------|-----------------|--------------|------------------|--------------|
|                 | Apple             |              |                  |              | Korean cabbage  |              |                  |              |
|                 | QuChERS and SPE   |              | FaPEX(Amine+C18) |              | QuChERS and SPE |              | FaPEX(Amine+C18) |              |
|                 | 0.01<br>mg/kd     | 0.1<br>mg/kg | 0.01<br>mg/kd    | 0.1<br>mg/kg | 0.01<br>mg/kd   | 0.1<br>mg/kg | 0.01<br>mg/kd    | 0.1<br>mg/kg |
| Dimethametryn   | 101(1)            | 103(2)       | 85(0)            | 78(1)        | 104(1)          | 102(2)       | 91(2)            | 79(8)        |
| Dimethenamid    | 101(1)            | 103(1)       | 86(1)            | 80(1)        | 104(3)          | 102(3)       | 92(3)            | 79(7)        |
| Dimethomorph_E  | 73(16)            | 76(3)        | 74(8)            | 69(2)        | 119(2)          | 100(2)       | 71(2)            | 80(8)        |
| Dimethomorph_Z  | 118(3)            | 127(1)       | 94(2)            | 87(1)        | 116(1)          | 107(3)       | 114(7)           | 79(7)        |
| Diniconazole    | 98(3)             | 102(1)       | 85(0)            | 78(1)        | 105(2)          | 101(2)       | 90(0)            | 77(8)        |
| Dinotefuran     | 96(1)             | 104(1)       | 86(1)            | 88(1)        | 91(1)           | 97(2)        | 107(7)           | 80(7)        |
| Epoxiconazole   | 99(2)             | 104(1)       | 89(2)            | 82(1)        | 107(2)          | 103(2)       | 100(5)           | 77(7)        |
| Ethoprophos     | 102(1)            | 105(1)       | 87(1)            | 81(1)        | 105(2)          | 104(3)       | 91(3)            | 79(7)        |
| Etoxazole       | 98(2)             | 102(1)       | 85(1)            | 79(1)        | 105(2)          | 102(3)       | 92(2)            | 78(7)        |
| Famoxadone      | 95(16)            | 100(3)       | 85(10)           | 78(1)        | 105(6)          | 102(1)       | 91(6)            | 79(8)        |
| Fenazaquin      | 98(2)             | 104(1)       | 82(1)            | 76(2)        | 102(2)          | 101(2)       | 90(1)            | 78(7)        |
| Fenbuconazole   | 105(5)            | 103(2)       | 86(1)            | 82(0)        | 105(5)          | 102(2)       | 92(3)            | 78(7)        |
| Fenhexamid      | 115(12)           | 104(2)       | 73(13)           | 73(2)        | 125(2)          | 105(4)       | 90(10)           | 78(8)        |
| Fenitrothion    | 101(13)           | 105(5)       | 102(9)           | 83(1)        | 100(8)          | 103(6)       | 102(10)          | 81(7)        |
| Fenobucarb      | 101(1)            | 104(1)       | 87(1)            | 79(1)        | 106(1)          | 103(2)       | 93(3)            | 79(8)        |
| Fenoxanil       | 98(1)             | 95(12)       | 89(2)            | 80(1)        | 109(2)          | 104(3)       | 95(5)            | 77(7)        |
| Fenpropathrin   | 99(1)             | 103(0)       | 86(2)            | 78(1)        | 109(2)          | 106(2)       | 99(10)           | 77(9)        |
| Fenpyroximate   | 98(5)             | 101(1)       | 84(1)            | 78(1)        | 107(1)          | 104(3)       | 95(3)            | 79(8)        |
| Fenthion        | 99(5)             | 101(3)       | 81(0)            | 78(2)        | 104(3)          | 99(2)        | 92(6)            | 78(7)        |
| Fentrazamide    | 105(5)            | 105(2)       | 94(4)            | 75(3)        | 101(4)          | 102(3)       | 90(6)            | 83(6)        |
| Ferimzone       | 81(2)             | 82(5)        | 56(0)            | 48(5)        | 90(2)           | 84(7)        | 82(1)            | 75(7)        |
| Flubendiamide   | 102(1)            | 105(2)       | 88(1)            | 78(2)        | 112(3)          | 107(2)       | 93(2)            | 78(7)        |
| Fludioxonil     | 95(4)             | 99(1)        | 88(2)            | 81(1)        | 83(12)          | 84(2)        | 81(8)            | 76(9)        |
| Flufenoxuron    | 98(2)             | 103(1)       | 89(1)            | 82(1)        | 106(1)          | 103(3)       | 93(0)            | 77(7)        |
| Fluopicolide    | 103(1)            | 104(2)       | 88(1)            | 79(1)        | 107(1)          | 104(2)       | 92(4)            | 79(8)        |
| Fluopyram       | 98(3)             | 106(1)       | 85(2)            | 81(1)        | 106(4)          | 105(3)       | 94(4)            | 78(7)        |
| Flupyradifuron  | 101(2)            | 101(3)       | 87(1)            | 80(1)        | 105(2)          | 103(3)       | 94(3)            | 80(8)        |
| Fluquinconazole | 99(2)             | 103(1)       | 85(5)            | 80(1)        | 110(4)          | 104(4)       | 92(3)            | 79(7)        |

| Compounds       | Recovery (RSD, %) |              |                  |              |                 |              |                  |              |
|-----------------|-------------------|--------------|------------------|--------------|-----------------|--------------|------------------|--------------|
|                 | Apple             |              |                  |              | Korean cabbage  |              |                  |              |
|                 | QuChERS and SPE   |              | FaPEX(Amine+C18) |              | QuChERS and SPE |              | FaPEX(Amine+C18) |              |
|                 | 0.01<br>mg/kd     | 0.1<br>mg/kg | 0.01<br>mg/kd    | 0.1<br>mg/kg | 0.01<br>mg/kd   | 0.1<br>mg/kg | 0.01<br>mg/kd    | 0.1<br>mg/kg |
| Flutolanil      | 100(0)            | 104(1)       | 87(1)            | 80(1)        | 109(2)          | 103(2)       | 94(4)            | 78(7)        |
| Flutriafol      | 99(1)             | 103(1)       | 79(2)            | 75(1)        | 105(3)          | 101(1)       | 91(3)            | 79(8)        |
| Fluxapyroxad    | 100(1)            | 104(1)       | 87(1)            | 79(1)        | 110(0)          | 103(2)       | 91(3)            | 79(7)        |
| Fosthiazate     | 101(1)            | 104(1)       | 87(1)            | 80(1)        | 107(3)          | 103(3)       | 94(3)            | 79(8)        |
| Hexaconazole    | 102(3)            | 103(2)       | 81(5)            | 76(2)        | 106(3)          | 100(2)       | 86(4)            | 80(8)        |
| Hexythiazox     | 98(2)             | 103(2)       | 84(2)            | 75(2)        | 106(1)          | 100(2)       | 93(2)            | 78(9)        |
| Imicyafos       | 100(1)            | 103(1)       | 87(1)            | 79(1)        | 105(2)          | 102(2)       | 94(3)            | 79(7)        |
| Imidacloprid    | 101(1)            | 96(3)        | 89(1)            | 78(3)        | 113(2)          | 105(3)       | 93(5)            | 80(10)       |
| Indoxacarb      | 102(2)            | 102(0)       | 90(2)            | 78(1)        | 105(9)          | 106(4)       | 88(3)            | 79(7)        |
| Ipconazole      | 98(1)             | 103(1)       | 86(1)            | 78(1)        | 104(1)          | 102(2)       | 90(2)            | 79(8)        |
| Iprobenfos      | 102(2)            | 104(1)       | 87(1)            | 81(1)        | 107(2)          | 104(2)       | 92(3)            | 80(8)        |
| Iprovalicarb    | 101(3)            | 109(1)       | 85(1)            | 78(1)        | 104(3)          | 97(21)       | 76(17)           | 80(8)        |
| Isazofos        | 101(2)            | 105(2)       | 86(1)            | 80(1)        | 108(0)          | 105(2)       | 94(4)            | 79(7)        |
| Isoprocarb/MIPC | 101(1)            | 103(1)       | 87(0)            | 79(1)        | 106(1)          | 103(2)       | 94(3)            | 79(8)        |
| Isoprothiolane  | 98(1)             | 104(1)       | 87(1)            | 79(1)        | 106(1)          | 103(3)       | 92(2)            | 79(8)        |
| Isopyrazam      | 101(2)            | 102(4)       | 87(3)            | 79(1)        | 109(5)          | 103(1)       | 101(6)           | 79(7)        |
| Kresoxim-methyl | 101(2)            | 104(2)       | 86(1)            | 81(1)        | 108(1)          | 105(3)       | 92(3)            | 80(7)        |
| Linuron         | 101(1)            | 103(1)       | 86(1)            | 81(1)        | 104(2)          | 102(2)       | 92(3)            | 80(8)        |
| Lufenuron       | 99(2)             | 103(1)       | 86(1)            | 82(1)        | 105(1)          | 102(2)       | 93(3)            | 79(8)        |
| Mandipropamid   | 99(0)             | 103(2)       | 87(3)            | 79(1)        | 106(2)          | 104(2)       | 88(2)            | 79(7)        |
| Metalaxyl       | 99(2)             | 104(1)       | 86(1)            | 78(1)        | 106(2)          | 102(2)       | 93(3)            | 79(8)        |
| Metamifop       | 98(0)             | 105(2)       | 84(4)            | 76(1)        | 106(3)          | 103(3)       | 94(2)            | 78(8)        |
| Metconazole     | 97(1)             | 102(1)       | 80(2)            | 76(1)        | 104(1)          | 99(2)        | 88(2)            | 78(8)        |
| Methidathion    | 99(1)             | 104(1)       | 87(2)            | 79(1)        | 106(2)          | 102(2)       | 93(3)            | 79(7)        |
| Methidathion    | 104(2)            | 103(2)       | 90(1)            | 80(1)        | 109(2)          | 103(2)       | 95(3)            | 78(8)        |
| Methoxyfenozide | 88(5)             | 101(5)       | 90(2)            | 80(1)        | 104(2)          | 103(3)       | 90(6)            | 80(7)        |
| Metrafenone     | 96(0)             | 103(0)       | 87(1)            | 75(1)        | 105(1)          | 103(3)       | 90(3)            | 79(8)        |
| Molinate        | 104(8)            | 103(2)       | 87(6)            | 77(2)        | 97(1)           | 104(4)       | 88(4)            | 80(7)        |

| Compounds                | Recovery (RSD, %) |              |                  |              |                 |              |                  |              |
|--------------------------|-------------------|--------------|------------------|--------------|-----------------|--------------|------------------|--------------|
|                          | Apple             |              |                  |              | Korean cabbage  |              |                  |              |
|                          | QuChERS and SPE   |              | FaPEX(Amine+C18) |              | QuChERS and SPE |              | FaPEX(Amine+C18) |              |
|                          | 0.01<br>mg/kd     | 0.1<br>mg/kg | 0.01<br>mg/kd    | 0.1<br>mg/kg | 0.01<br>mg/kd   | 0.1<br>mg/kg | 0.01<br>mg/kd    | 0.1<br>mg/kg |
| Myclobutanil             | 98(4)             | 104(1)       | 85(1)            | 79(0)        | 113(5)          | 104(3)       | 90(2)            | 79(8)        |
| Napropamid               | 99(2)             | 103(1)       | 86(1)            | 79(1)        | 108(3)          | 102(3)       | 92(4)            | 79(7)        |
| Novaluron                | 99(3)             | 106(2)       | 85(1)            | 73(1)        | 110(5)          | 104(3)       | 98(4)            | 79(8)        |
| Nuarimol                 | 99(1)             | 102(2)       | 81(1)            | 78(2)        | 110(3)          | 103(2)       | 91(2)            | 79(6)        |
| Oxadiazon                | 101(1)            | 104(1)       | 88(1)            | 78(0)        | 106(3)          | 104(3)       | 88(3)            | 79(8)        |
| Oxadixyl                 | 108(2)            | 103(1)       | 88(2)            | 80(1)        | 107(12)         | 99(10)       | 76(17)           | 78(8)        |
| Paclobutrazol            | 101(2)            | 104(0)       | 89(1)            | 78(1)        | 105(3)          | 102(2)       | 90(1)            | 79(8)        |
| Penconazole              | 97(2)             | 105(2)       | 85(1)            | 79(1)        | 103(3)          | 104(2)       | 92(2)            | 79(7)        |
| Pencycuron               | 94(1)             | 98(1)        | 79(1)            | 124(1)       | 92(1)           | 92(3)        | 84(2)            | 89(7)        |
| Pendimethalin            | 95(1)             | 103(0)       | 87(2)            | 77(0)        | 108(4)          | 103(3)       | 94(4)            | 79(8)        |
| Pentoxazone              | 103(9)            | 101(6)       | 96(5)            | 76(0)        | ND              | 98(9)        | 99(8)            | 82(6)        |
| Phenthoate               | 99(1)             | 105(1)       | 88(1)            | 81(1)        | 107(1)          | 105(2)       | 94(4)            | 79(7)        |
| Phorate                  | 96(10)            | 102(1)       | 92(2)            | 78(2)        | 91(3)           | 95(4)        | 88(8)            | 77(9)        |
| Phosphamidon             | 78(4)             | 101(2)       | 85(1)            | 78(1)        | 104(1)          | 86(1)        | 98(3)            | 80(7)        |
| Picoxystrobin            | 101(1)            | 104(1)       | 85(0)            | 81(1)        | 106(1)          | 104(3)       | 93(4)            | 79(8)        |
| <del>Propaquizafop</del> | 99(1)             | 104(1)       | 86(1)            | 78(1)        | 106(2)          | 104(3)       | 91(2)            | 80(7)        |
| Probenazole              | 93(2)             | 92(2)        | 54(1)            | 54(1)        | 92(2)           | 86(3)        | 63(2)            | 51(11)       |
| Prochloraz               | 86(3)             | 100(1)       | 79(3)            | 78(1)        | 85(4)           | 83(2)        | 75(7)            | 77(11)       |
| Propamocarb              | 89(1)             | 98(1)        | 19(1)            | 0(-)         | 90(1)           | 89(1)        | 22(23)           | 74(8)        |
| Propaquizafop            | 102(2)            | 103(1)       | 84(5)            | 75(0)        | 109(3)          | 102(2)       | 96(4)            | 78(8)        |
| Propiconazole            | 104(4)            | 105(2)       | 89(3)            | 79(1)        | 110(3)          | 102(2)       | 93(4)            | 79(7)        |
| Pyraclonil               | 100(1)            | 104(1)       | 87(1)            | 79(1)        | 106(2)          | 103(3)       | 93(3)            | 79(8)        |
| Pyraclostrobin           | 95(4)             | 103(9)       | 87(4)            | 78(0)        | 108(3)          | 103(3)       | 96(4)            | 79(7)        |
| Pyridaben                | 94(1)             | 99(1)        | 84(2)            | 77(1)        | 103(1)          | 102(2)       | 85(2)            | 79(7)        |
| Pyridaphenthion          | 97(2)             | 105(1)       | 87(1)            | 79(1)        | 109(1)          | 103(2)       | 94(5)            | 79(8)        |
| Pyrifluquinazon          | 91(4)             | 93(1)        | 34(2)            | 33(7)        | 98(1)           | 92(4)        | 64(19)           | 78(8)        |
| Pyrimethanil             | 98(2)             | 102(1)       | 85(4)            | 78(1)        | 102(2)          | 101(2)       | 90(2)            | 79(8)        |
| Pyriproxyfen             | 100(2)            | 104(1)       | 85(1)            | 78(1)        | 106(2)          | 103(3)       | 91(3)            | 79(7)        |

| Compounds       | Recovery (RSD, %) |              |                  |              |                 |              |                  |              |
|-----------------|-------------------|--------------|------------------|--------------|-----------------|--------------|------------------|--------------|
|                 | Apple             |              |                  |              | Korean cabbage  |              |                  |              |
|                 | QuChERS and SPE   |              | FaPEX(Amine+C18) |              | QuChERS and SPE |              | FaPEX(Amine+C18) |              |
|                 | 0.01<br>mg/kd     | 0.1<br>mg/kg | 0.01<br>mg/kd    | 0.1<br>mg/kg | 0.01<br>mg/kd   | 0.1<br>mg/kg | 0.01<br>mg/kd    | 0.1<br>mg/kg |
| Quinoclamine    | 102(3)            | 104(1)       | 88(1)            | 79(1)        | 108(2)          | 103(2)       | 94(3)            | 79(7)        |
| Spinetoram(J)   | 88(3)             | 100(2)       | 29(2)            | 13(16)       | 89(1)           | 77(4)        | 50(11)           | 73(19)       |
| Spinetoram(L)   | 81(1)             | 96(1)        | 25(3)            | 12(17)       | 86(2)           | 72(3)        | 49(12)           | 75(20)       |
| Spirotetramat   | 94(1)             | 98(1)        | 81(0)            | 78(2)        | 101(2)          | 96(3)        | 89(2)            | 72(7)        |
| Sulfoxaflor     | 100(0)            | 105(2)       | 87(1)            | 80(1)        | 104(2)          | 103(2)       | 93(3)            | 79(7)        |
| Tebufenozide    | 101(1)            | 105(1)       | 87(1)            | 82(1)        | 108(2)          | 104(2)       | 95(2)            | 79(8)        |
| Tebufenpyrad    | 99(4)             | 104(1)       | 82(2)            | 75(0)        | 110(2)          | 101(3)       | 94(4)            | 78(9)        |
| Tebupirimfos    | 99(1)             | 104(1)       | 84(2)            | 77(1)        | 104(2)          | 103(2)       | 91(3)            | 79(8)        |
| Tetraconazole   | 103(2)            | 104(2)       | 88(1)            | 82(1)        | 110(3)          | 102(3)       | 99(2)            | 77(9)        |
| Thiacloprid     | 98(0)             | 104(1)       | 85(1)            | 81(1)        | 105(2)          | 102(2)       | 94(4)            | 79(8)        |
| Thiamethoxam    | 100(2)            | 102(2)       | 85(1)            | 83(4)        | 104(1)          | 102(2)       | 91(3)            | 80(10)       |
| Thifluzamide    | 105(2)            | 105(2)       | 88(2)            | 82(1)        | 105(3)          | 106(3)       | 96(4)            | 77(8)        |
| Thiobencarb     | 96(1)             | 103(1)       | 85(1)            | 79(1)        | 106(2)          | 104(2)       | 90(4)            | 78(8)        |
| Triadimefon     | 101(2)            | 104(1)       | 83(3)            | 78(2)        | 100(3)          | 102(3)       | 88(5)            | 78(8)        |
| Tricyclazole    | 89(3)             | 102(2)       | 77(2)            | 75(1)        | 109(12)         | 98(2)        | 91(3)            | 78(7)        |
| Trifloxystrobin | 94(2)             | 102(1)       | 87(2)            | 80(1)        | 107(2)          | 104(2)       | 94(3)            | 79(8)        |
| Triflumizole    | 85(1)             | 95(2)        | 75(0)            | 83(1)        | 79(7)           | 76(2)        | 77(9)            | 71(13)       |
| Uniconazole     | 99(2)             | 103(2)       | 81(3)            | 76(1)        | 106(3)          | 101(2)       | 89(4)            | 78(7)        |
